# Supplementary material for: Zeb1 regulation of wound-healing-induced inflammation in alkali-damaged corneas
Source: PubMed Central journal article supplement — iScience. 2022 Mar 8;25(4):104038. doi: 10.1016/j.isci.2022.104038 (PMC8941209; doi:10.1016/j.isci.2022.104038), 2022-03-08
Supplement: mmc1.pdf [file mmc1.pdf]

**iScience, Volume 25**

**Supplemental information**

**Zeb1 regulation of wound-healing-induced  
inflammation in alkali-damaged corneas**

**Wei Liang, Yingnan Zhang, Liang Zhou, Xiaoqin Lu, Margaret E. Finn, Wei Wang, Hui Shao, Douglas C. Dean, Lijun Zhang, and Yongqing Liu**

Table S1. Primers Used for qPCR Detection, Related to STAR Methods

| Primer name | Sequence (5'—3')       | Amplicon (bp) |
|-------------|------------------------|---------------|
| Mm Acta1 LP | GACGAGACCACCGCTCTTGT   | 192           |
| Mm Acta1 RP | GGTCAGGATACCTCGCTTGCT  |               |
| Mm Il-1b LP | ACTCATTGTGGCTGTGGAGA   | 199           |
| Mm Il-1b RP | TTGTTTCATCTCGGAGCCTGT  |               |
| Mm Itga3 RP | GTCGCCTTCGCCTTCAACCT   | 235           |
| Mm Itga3 LP | CCATCCGTTTACAGTCGTCCTT |               |
| Mm Nf-kb LP | GCTTTGCAAACCTGGGAATA   | 150           |
| Mm Nf-kb RP | TCAGGTCCATCTCCTTGCTC   |               |
| Mm p15 LP   | CCCTGCCACCCTTACCAGA    | 169           |
| Mm p15 RP   | CAGATACCTCGCAATGTCACG  |               |
| Mm p27 LP   | TTGGGTCTCAGGCAAACCTCT  | 157           |
| Mm p27 RP   | TCTGTTCTGTTGGCCCTTTT   |               |
| Mm p57 LP   | GGAGCAGGACGAGAATCAAG   | 189           |
| Mm p57 RP   | ACGTTTGGAGAGGGACACC    |               |
| Mm Stat3 LP | AGCTGGACACACGCTACCT    | 190           |
| Mm Stat3 RP | AGGAATCGGCTATATTGCTGGT |               |
| Mm Tgfb1 LP | TGCGCTTGCAGAGATTAATA   | 186           |
| Mm Tgfb1 RP | AGCCCTGTATTCCGTCTCCT   |               |
| Mm Tgfb2 LP | CAGCGCTACATCGATAGCAA   | 199           |
| Mm Tgfb2 RP | CCTCGAGCTCTTCGCTTTTA   |               |
| Mm Tgfb3 LP | GATGAGCACATAGCCAAGCA   | 177           |
| Mm Tgfb3 RP | ATTGGGCTGAAAGGTGTGAC   |               |
| Mm Tnfa LP  | CGTCGTAGCAAACCACCAAG   | 241           |
| Mm Tnfa RP  | GGCAGAGAGGAGGTTGACTT   |               |
| Mm Vim LP   | CGGCTGCGAGAGAAATTGC    | 124           |
| Mm Vim RP   | CCACTTTCCGTTCAAGGTCAAG |               |
| Mm Zeb1 LP  | TGGCAAGACAACGTGAAAGA   | 200           |
| Mm Zeb1 RP  | AACTGGGAAAATGCATCTGG   |               |

Table S2. Primers Used for ChIP-PCR, Related to STAR Methods

| Primer name     | Sequence (5'—3')     | Amplicon (bp) |
|-----------------|----------------------|---------------|
| Mm Il-1b Pro LP | AAGCACCTGGCATTATCAG  | 168           |
| Mm Il-1b Pro RP | GGTGCTTCTGTGCTCTCCAT |               |
| Mm Nf-kb Pro LP | GGCACTTTGCCCAAAGAATA | 162           |
| Mm Nf-kb Pro RP | ATCATCGCTGTGGATGGAAT |               |
| Mm Stat3 Pro LP | CTCCACAAACCCAAATGCTT | 232           |
| Mm Stat3 Pro RP | GGGAGGGAGGAGACATTAGC |               |
| Mm Tgfb1 Pro LP | TAATGGCACAGCAGTGAAGC | 204           |
| Mm Tgfb1 Pro RP | TTATTAAGTGCCCCCGACAG |               |
| Mm Tgfb2 Pro LP | CCATGTAGAAACGGGATGCT | 202           |
| Mm Tgfb2 Pro RP | ACAAAGTGACGCGCTAGGAT |               |
| Mm Tgfb3 Pro LP | GGCTGGGAACGTGAACTAAC | 193           |
| Mm Tgfb3 Pro RP | CCGAGCCCATTGAAAAATA  |               |
| Mm Tnfa Pro LP  | CTACCTGGCCATGACAACCT | 231           |
| Mm Tnfa Pro RP  | ACTTTCCGAACACCCTTCT  |               |
